# Supplementary material for: Enzyme kinetics and distinct modulation of the protein kinase N family of kinases by lipid activators and small molecule inhibitors
Source: PubMed Central journal article supplement (PMC3958129; doi:10.1042/bsr20140010), 2014-03-18
Supplement: bsr034e097add.pdf [file bsr034e097add.pdf]

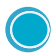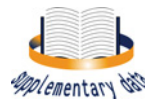

OPEN ACCESS

## SUPPLEMENTARY DATA

# Enzyme kinetics and distinct modulation of the protein kinase N family of kinases by lipid activators and small molecule inhibitors

Matthew D. FALK\*, Wei LIU†, Ben BOLAÑOS†, Keziban UNSAL-KACMAZ‡, Anke KLIPPEL‡<sup>1</sup>, Stephan GRANT\*, Alexei BROOUN† and Sergei TIMOFEEVSKI\*<sup>2</sup>

\*Pfizer Oncology Research Unit, Pfizer Inc., San Diego, CA 92121, U.S.A.

†Pfizer Worldwide Medicinal Chemistry, Pfizer Inc., San Diego, CA 92121, U.S.A.

‡Pfizer Oncology Research Unit, Pfizer Inc., Pearl River, NY 10965, U.S.A.

Supplementary Figure S1 is on the following page.

<sup>1</sup> Present address: Celgene Corporation, Summit, NJ 70901, U.S.A.

<sup>2</sup> To whom correspondence should be addressed (email sergei.timofeevski@pfizer.com).

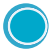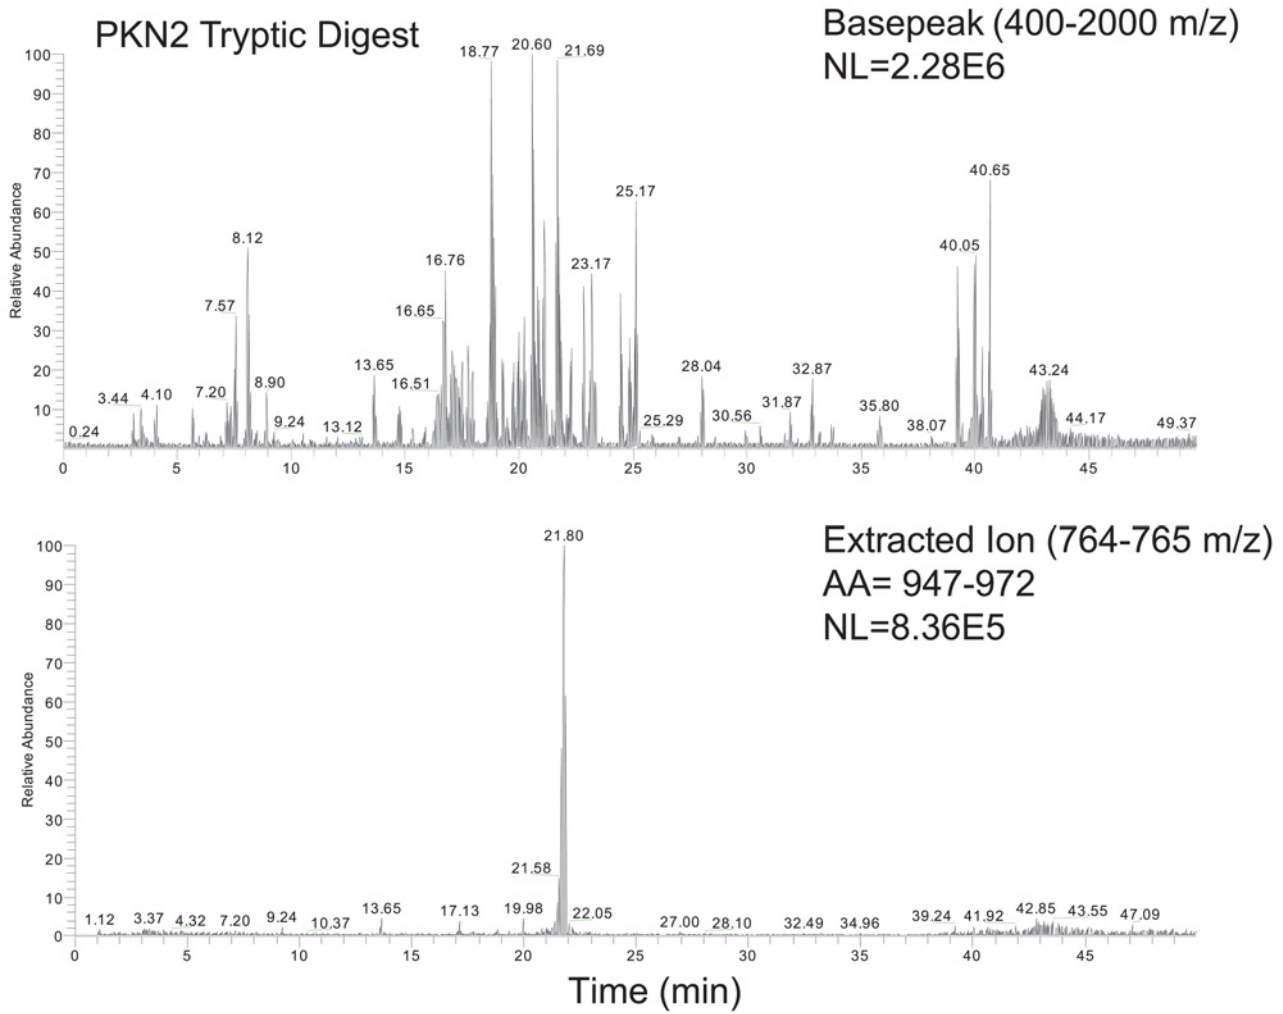

**Figure S1** (Top) LC-MS basepeak chromatograph for PKN2 tryptic digest; (bottom) extracted MS ion chromatograph for phosphorylated turn-motif peptide, amino acids 947-972

Received 14 January 2014; accepted 29 January 2014

Published as Immediate Publication 29 January 2014, doi 10.1042/BSR20140010
